# Supplementary material for: Evaluation of the Relationship Between Fasting Blood Sugar (FBS) and HbA1c Levels and Recurrent Aphthous Lesions: A Cross-Sectional Study
Source: Research Square preprint supplement (doi:10.21203/rs.3.rs-7288666/v1), 2025-09-15
Supplement: Supplementary file 1 [file e4023220a771da6677acffad.docx]

**Screening and Eligibility Questionnaire**

**(To be completed before laboratory referral)**

**Study Title: Evaluation of the Relationship Between Fasting Blood Sugar (FBS) and HbA1c Levels and Recurrent Aphthous Lesions: A Cross-Sectional Study**

Research Center: Department of Oral and Maxillofacial Diseases, School of Dentistry, Shiraz University of Medical Sciences

Date of Completion: ____ / ____ / ______

Participant Code: ___________

Section A – Demographic Information

Full Name: _______________________________________

Date of Birth (DD/MM/YYYY): _______________________

Age: __________ years

Sex: ☐ Male ☐ Female

Contact Number: _________________________________

Section B – Medical and Dental History

Have you ever been diagnosed with recurrent aphthous stomatitis (RAS)?

☐ Yes ☐ No

If yes, how many episodes do you experience per year on average?

☐ 3–4 times ☐ 5–6 times ☐ More than 6 times

When was your most recent episode? (DD/MM/YYYY): ______________

Have you been diagnosed with any of the following conditions? (check all that apply)

☐ Autoimmune diseases

☐ Diabetes mellitus

☐ Other systemic diseases (please specify): __________________________

☐ None

Are you currently taking any of the following medications? (check all that apply)

☐ Corticosteroids

☐ Immunosuppressants

☐ Other medications (please specify): __________________________

☐ None

Do you smoke tobacco products?

☐ Yes ☐ No

Have you had any major illness, surgery, or hospitalization in the past 6 months?

☐ Yes (please specify): __________________________

☐ No

Section C – Laboratory Appointment Readiness

Are you able to attend the laboratory between 07:00 and 09:00 AM for blood sample collection?

☐ Yes ☐ No

Are you able to fast (no food or drink except plain water) for at least 8 hours before your laboratory visit?

☐ Yes ☐ No

Do you agree to provide a 5 ml fasting blood sample for this study?

☐ Yes ☐ No

Important Instructions for Eligible Participants:

Your laboratory appointment will be scheduled only if you meet the eligibility criteria.

Please avoid eating or drinking anything except water for at least 8 hours before your appointment.

Bring a valid ID on the day of the test.

Researcher’s Notes (For Official Use Only):

☐ Eligible ☐ Not Eligible

Reason for ineligibility (if applicable): _______________________________

Scheduled Laboratory Appointment:

Date: ____ / ____ / ______ Time: ___________

Participant’s Declaration:

I have answered the above questions truthfully and understand the requirements for participation in this study.

Signature of Participant: ______________________ Date: ____ / ____ / ______

Signature of Investigator: _____________________ Date: ____ / ____ / ______
